# Supplementary material for: Performance assessment of the county healthcare systems in Kenya: a mixed-methods analysis
Source: HighWire-hosted journal article supplement (doi:10.1136/bmjgh-2020-004707), 2021-06-01
Supplement: bmjgh-2020-004707supp001_data_supplement.pdf [file bmjgh-2020-004707supp001_data_supplement.pdf]

*Appendix to Assessment of Kenya's county healthcare systems: a mixed-methods analysis*

## Data

In table #1 below we display the sources of relevant data used in the analysis. It is worth noting that IntraHealth provided data on staffing levels for the most recent fiscal year (FY) but no historical data on staffing levels existed, only historical attritions and new hires. We calculated historical staffing levels (e.g. FY 2016/17 staffing levels) by subtracting new hires and adding attritions to FY 2017/18 staffing levels; we repeated this process to calculate FY 2015/2014 and FY 2015/16 staffing levels. Extreme outliers (e.g. order of magnitude difference from adjacent years) accounted for less than 1 percent of total data. These data were replaced with an imputed value that was calculated with county means and time trends. Additionally, we collected data on county-level expenditure that were sourced from county government expenditure reports, and data on measures like HIV/AIDS prevalence, stunting, poverty rate, public facility usage, and access to health facility were sourced from the 2018 Kenyan Household Health Expenditure and Utilization Survey, while measures such as absenteeism and diagnostic accuracy were sourced from the 2018 Kenyan Service Delivery Indicator survey.

**Table #1**

| Data                                                                                                                                             | Source                                                         |
|--------------------------------------------------------------------------------------------------------------------------------------------------|----------------------------------------------------------------|
| Service volumes (outpatient, inpatient bed days, inpatient admissions, laboratory test performed, imaging performed) and number of beds and cots | DHIS2                                                          |
| Staffing levels (Number of clinical officers, nurses, other medical care staff, administrators, and non-medical staff)                           | IntraHealth                                                    |
| Drugs purchased and donated                                                                                                                      | Kenya Medical supplies authority                               |
| Health financing and approved budget data                                                                                                        | Country and Government Expenditure Reports                     |
| diagnostic accuracy, absenteeism, medical equipment availability, pharmaceutical availability                                                    | Kenya Service Delivery Indicator Survey, 2018                  |
| Out-of-pocket spending, HIV/AIDS prevalence, public healthcare facility utilization, poverty rate, self-reported health, stunting prevalence     | Kenya Household Health Expenditure Utilization Survey, 2017-18 |

## Methods

As mentioned in the main text, when analyzing the specifications of the stochastic frontier analysis (SFA) model, we took into consideration the plausibility of the coefficients in the SFA model, their significance, and Akiake information criterion (AIC). In Table #2 we present estimated coefficients of a sampling of model specifications we considered. Note that when computing standard errors, we clustered on counties.

**Table 2**

| <i>Covariates</i>                                          | (1)              |          | (2)              |          | (3)              |          | (4)              |          | (5)              |          |
|------------------------------------------------------------|------------------|----------|------------------|----------|------------------|----------|------------------|----------|------------------|----------|
|                                                            | <i>Estimates</i> | <i>p</i> | <i>Estimates</i> | <i>p</i> | <i>Estimates</i> | <i>p</i> | <i>Estimates</i> | <i>p</i> | <i>Estimates</i> | <i>p</i> |
| log ratio of bed days to outpatient visits                 | -0.138           | 0.026    | -0.138           | 0.028    | -0.138           | 0.030    | -0.138           | 0.006    | -0.545           | <0.001   |
| log beds per capita                                        | 0.204            | 0.046    | 0.206            | 0.084    | 0.203            | 0.076    | 0.204            | 0.015    | 1.189            | 0.002    |
| log medical care staff per capita                          | 0.316            | 0.004    | 0.315            | 0.004    | 0.360            | 0.015    | 0.001            | 0.001    | -4.170           | <0.001   |
| log purchased drugs per capita                             | 0.469            | 0.043    | 0.046            | 0.053    | 0.455            | 0.045    |                  |          | -0.172           | 0.002    |
| log donated drugs per capita                               | 0.008            | 0.798    | 0.007            | 0.817    | 0.156            | 0.653    |                  |          | -0.720           | 0.015    |
| log ratio of imaging services to diagnostic services       |                  |          |                  |          | -0.001           | 0.964    |                  |          |                  |          |
| log support staff per capita                               |                  |          |                  |          | -0.045           | 0.674    |                  |          |                  |          |
| log total drug spending per capita (purchased and donated) |                  |          |                  |          |                  |          | 0.035            | 0.288    |                  |          |
| log ratio of bed days to outpatient visits squared         |                  |          |                  |          |                  |          |                  |          | -0.540           | <0.001   |
| log beds per capita squared                                |                  |          |                  |          |                  |          |                  |          | 0.065            | 0.006    |
| log medical care staff per capita squared                  |                  |          |                  |          |                  |          |                  |          | -0.308           | <0.001   |
| log purchased drugs per capita squared                     |                  |          |                  |          |                  |          |                  |          | 0.035            | <0.001   |
| log donated drugs per capita squared                       |                  |          |                  |          |                  |          |                  |          | 0.062            | <0.001   |
| <i>Year Dummies</i>                                        |                  |          |                  |          |                  |          |                  |          |                  |          |
| 2015                                                       | 0.014            | 0.597    | 0.013            | 0.614    | 0.003            | 0.926    | 0.004            | 0.874    | -0.053           | 0.057    |
| 2016                                                       | -0.050           | 0.188    | -0.050           | 0.191    | -0.071           | 0.246    | -0.071           | 0.074    | -0.161           | 0.002    |
| 2017                                                       | -0.137           | 0.004    | -0.136           | 0.004    | -0.162           | 0.041    | -0.150           | 0.002    | -0.018           | 0.000    |
| <i>Parameters of one sided distribution</i>                |                  |          |                  |          |                  |          |                  |          |                  |          |
| <i>mu</i>                                                  |                  |          | -0.148           | 0.797    |                  |          |                  |          |                  |          |
| <i>sigma u</i>                                             | -2.275           | <0.001   | -2.054           | 0.004    | -2.270           | <0.001   | -2.520           | <0.001   | -2.762           | <0.001   |
| <i>sigma v</i>                                             | -4.063           | <0.001   | -3.985           | <0.001   | -4.060           | <0.001   | -3.670           | <0.001   | -23.990          | <0.001   |
| Distribution of inefficiency                               | half-normal      |          | truncated normal |          | half-normal      |          | half-normal      |          | half-normal      |          |
| AIC                                                        | -1.597           |          | 0.267            |          | 1.98             |          | 2.51             |          | -60.64           |          |

We ultimately implemented specification 1. This decision was supported by the fact that it appeared the truncated normal distribution of inefficiency implemented in specification 2 had no real advantage compared to the half normal assumption of the distribution of inefficiency implemented in specification 1. When we included additional covariates such as imaging service or other staff aside from medical care staff (doctors, clinical officers, and nurses), these covariates had no impact as the covariates' p values were quite large. When we condensed spending on drugs into one covariate, the covariate lost significance and the AIC value deteriorated. In the fifth specification tested, we implemented a quadratic model. While this specification had a lower AIC value, the coefficient on important covariates such as medical care staff and drug spending had implausible values.

### Determinant of efficiency

In Table 3 we present alternative specifications of our determinants of efficiency regression. Note, in the specifications presented below we added specific covariates of interest to our preferred model specification.

Table 3

| Predictors                                                                   | (1)           |              | (2)           |              | (3)           |                  | (4)           |                  | (5)           |                  |
|------------------------------------------------------------------------------|---------------|--------------|---------------|--------------|---------------|------------------|---------------|------------------|---------------|------------------|
|                                                                              | Estimates     | p            | Estimates     | p            | Estimates     | p                | Estimates     | p                | Estimates     | p                |
| <b>Within</b> (time-varying)                                                 |               |              |               |              |               |                  |               |                  |               |                  |
| log reporting rate                                                           | 1.250         | <b>0.002</b> | 1.250         | <b>0.002</b> | 1.250         | <b>0.002</b>     | 1.250         | <b>0.002</b>     | 1.250         | <b>0.002</b>     |
| log budget execution rate                                                    | 0.380         | <b>0.006</b> | 0.380         | <b>0.006</b> | 0.380         | <b>0.006</b>     | 0.380         | <b>0.006</b>     | 0.380         | <b>0.006</b>     |
| log total spending on health per cap                                         |               |              |               |              |               |                  |               |                  |               |                  |
| log ratio of outpatient visits to inpatient bed days                         |               |              |               |              |               |                  |               |                  |               |                  |
| log ratio of doctors and clinical officers to other healthcare staff         |               |              |               |              |               |                  |               |                  |               |                  |
| <b>Between</b> (time-invariant)                                              |               |              |               |              |               |                  |               |                  |               |                  |
| Mean of log reporting rate                                                   | 2.520         | <b>0.008</b> | 2.530         | <b>0.008</b> | 2.350         | <b>0.016</b>     | 2.720         | <b>0.005</b>     | 2.760         | <b>0.010</b>     |
| Mean of log budget execution rate                                            | -0.390        | 0.280        | -0.430        | 0.236        | -0.370        | 0.313            | -0.460        | 0.196            | -0.390        | 0.276            |
| Mean of log total spending on health per cap                                 |               |              |               |              |               |                  |               |                  |               |                  |
| Mean of log ratio of outpatient visits to inpatient bed days                 |               |              |               |              |               |                  |               |                  |               |                  |
| Mean of log ratio of doctors and clinical officers to other healthcare staff |               |              |               |              |               |                  |               |                  |               |                  |
| log out-of-pocket spending per consultation at public facility               | -0.540        | <b>0.003</b> | -0.630        | <b>0.001</b> | -0.610        | <b>&lt;0.001</b> | -0.590        | <b>&lt;0.001</b> | -0.620        | <b>&lt;0.001</b> |
| log HIV/AIDS prevalence                                                      | -0.250        | <b>0.028</b> | -0.250        | <b>0.036</b> | -0.220        | 0.070            | -0.240        | <b>0.039</b>     | -0.270        | <b>0.025</b>     |
| log public healthcare facility utilization                                   | 1.350         | <b>0.026</b> | 1.480         | <b>0.017</b> | 1.530         | <b>0.015</b>     | 1.240         | <b>0.040</b>     | 1.310         | <b>0.039</b>     |
| log access to healthcare facility                                            |               |              |               |              |               |                  |               |                  |               |                  |
| log fraction of total facilities that are primary care facilities            | 2.450         | 0.415        |               |              |               |                  |               |                  |               |                  |
| log poverty rate                                                             |               |              |               |              |               |                  |               |                  |               |                  |
| log of self-reported health                                                  |               |              |               |              |               |                  |               |                  |               |                  |
| log diagnostic accuracy                                                      |               |              | 0.370         | 0.612        |               |                  |               |                  |               |                  |
| log absenteeism                                                              |               |              |               |              | 0.310         | 0.493            |               |                  |               |                  |
| log stunting prevalence                                                      |               |              |               |              |               |                  |               |                  |               |                  |
| log medical equipment availability                                           |               |              |               |              |               |                  | -0.300        | 0.188            |               |                  |
| log pharmaceutical availability                                              |               |              |               |              |               |                  |               |                  | 0.350         | 0.597            |
| R <sup>2</sup> conditional / R <sup>2</sup> marginal                         | 0.781 / 0.378 |              | 0.771 / 0.375 |              | 0.764 / 0.374 |                  | 0.766 / 0.377 |                  | 0.766 / 0.373 |                  |
| AIC                                                                          | 302.615       |              | 292.7         |              | 285.309       |                  | 278.694       |                  | 279.44        |                  |

### Alternative efficiency estimates

The Excel file accompanying this appendix contains three versions of estimates of technical efficiency for all counties and across all fiscal years. The three versions are (1) efficiency estimates without adjusting for reporting rate, public facility utilization, or HIV/AIDS prevalence; (2) technical efficiency estimates controlling for only reporting rate; (3) and technical efficiency estimates controlling for reporting rate, HIV/AIDS prevalence, and public facility utilization.
